# Supplementary material for: Cu–Ag/hydrotalcite catalysts for dehydrogenative cross-coupling of primary and secondary benzylic alcohols
Source: Royal Society of Chemistry journal article supplement (doi:10.1039/c5ra22542f), 2016-01-01
Supplement: c5ra22542f1.pdf [file c5ra22542f1.pdf]

## Supporting information

### **Cu-Ag/Hydrotalcite Catalysts for Dehydrogenative Cross-Coupling of Primary and Secondary Benzylic Alcohols**

Jin Xu <sup>a,b</sup>, Hongmei Yue <sup>a,b</sup>, Sheng Liu <sup>a,b</sup>, Hanfei Wang <sup>a,b</sup>, Yuqun Du <sup>a,b</sup>,  
Chunli Xu <sup>a,b,\*</sup>, Wensheng Dong <sup>a,b</sup>, Chunling Liu <sup>a,b</sup>

<sup>a</sup> Key Laboratory of Applied Surface and Colloid Chemistry (Shaanxi Normal University), Ministry of Education, Xi'an 710119, PR China

<sup>b</sup> School of Chemistry and Chemical Engineering, Shaanxi Normal University, Chang'an West Street 620, Xi'an 710119, PR China

\* Corresponding author.

School of Chemistry and Chemical Engineering, Shaanxi Normal University, 620 Chang'an West Street, Xi'an 710119, PR China

Tel: 86-29-81530779

E-mail: xuchunli@snnu.edu.cn

## **S1 Effect of calcination temperature**

As shown in Table S1, both the conversion of benzyl alcohol and yield of  $\beta$ -phenylpropiophenone were affected by the calcination and reduction temperature. At 300 °C the yield was 76% after 0.5 h and 98% after 1 h, but at 600 °C the yield after 0.5 h was only 29%. This decrease in yield may be ascribed to the increase in the size of Cu nanoparticles at the higher temperature.

## **S2 Effect of reaction conditions**

### **S2.1 Reaction temperature**

As shown in Fig. S1, increasing the reaction temperature caused both the conversion of benzyl alcohol and the yield of  $\beta$ -phenylpropiophenone to increase. A 2% yield at 120 °C was increased to 24 and 76% at temperatures of 140 and 150 °C, respectively.

### **S2.2 Reaction time**

Similar to the situation for temperature and as shown in Fig. S2, increasing the reaction time increased the yield of  $\beta$ -phenylpropiophenone, which reached nearly 99% after 1 h.

### **S2.3 Effect of solvents**

The properties of solvents used affect the reaction rate of secondary and primary alcohols [8,11]. Toluene [8], *p*-xylene [11], and *o*-xylene [11] are common solvents for the cross-coupling of secondary and primary alcohols. The effect of the three solvents was investigated in the presence

of Cu-Ag/HT with reactivity increasing in line with the order listed above, as shown in Table S2.

#### **S2.4 Catalyst amount**

As shown in Fig. S3, increasing the amount of catalyst increased both the conversion of benzyl alcohol and the yield of  $\beta$ -phenylpropiophenone up to a point. With 0.04 g of catalyst the conversion and the yield were 73 and 45%, respectively. However, when the amount of catalyst was 0.1 g or more both values increased to the maximum observed value of nearly 99%.

**Table S1** Effect of calcination and reduction temperature on catalytic activity <sup>a</sup>

| Entry | Calcination and reduction temperature | Reaction time | Conversion of benzyl alcohol (%) | Yield to $\beta$ -phenylpropiophenone (%) |
|-------|---------------------------------------|---------------|----------------------------------|-------------------------------------------|
| 1     | 300 °C                                | 0.5 h         | 88                               | 76                                        |
|       |                                       | 1 h           | 99                               | 98                                        |
| 2     | 600 °C                                | 0.5 h         | 55                               | 29                                        |
|       |                                       | 1 h           | 84                               | 80                                        |

<sup>a</sup> Reaction conditions: benzyl alcohol (1.0 mmol), 1-phenylethanol (1.0 mmol), catalyst (0.1 g), *o*-xylene (3 mL), 150 °C, 1 bar N<sub>2</sub>

**Table S2** The effect of reaction solvents on reactivity <sup>a</sup>

| Entry | Solvents         | T/°C <sup>b</sup> | t/h | Conversion of benzyl alcohol (%) | Yield to $\beta$ -phenylpropiophenone (%) |
|-------|------------------|-------------------|-----|----------------------------------|-------------------------------------------|
| 1     | toluene          | 110               | 5   | 51                               | 0                                         |
| 2     | <i>p</i> -xylene | 110               | 5   | 64                               | 3                                         |
| 3     | <i>o</i> -xylene | 110               | 5   | 72                               | 16                                        |
| 4     | toluene          | 125               | 1   | 65                               | 0                                         |
| 5     | <i>p</i> -xylene | 125               | 1   | 69                               | 2                                         |
| 6     | <i>o</i> -xylene | 125               | 1   | 71                               | 10                                        |
| 7     | <i>p</i> -xylene | 140               | 2   | 57                               | 30                                        |
| 8     | <i>o</i> -xylene | 140               | 2   | 87                               | 47                                        |
| 9     | <i>p</i> -xylene | 150               | 1   | 70                               | 58                                        |
| 10    | <i>o</i> -xylene | 150               | 1   | 96                               | 95                                        |

<sup>a</sup> Reaction conditions: benzyl alcohol (1.0 mmol), 1-phenylethanol (1.0 mmol), solvent (3 mL), Cu-Ag/HT (0.1 g), 1 bar N<sub>2</sub>.

<sup>b</sup> Temperature of oil bath.

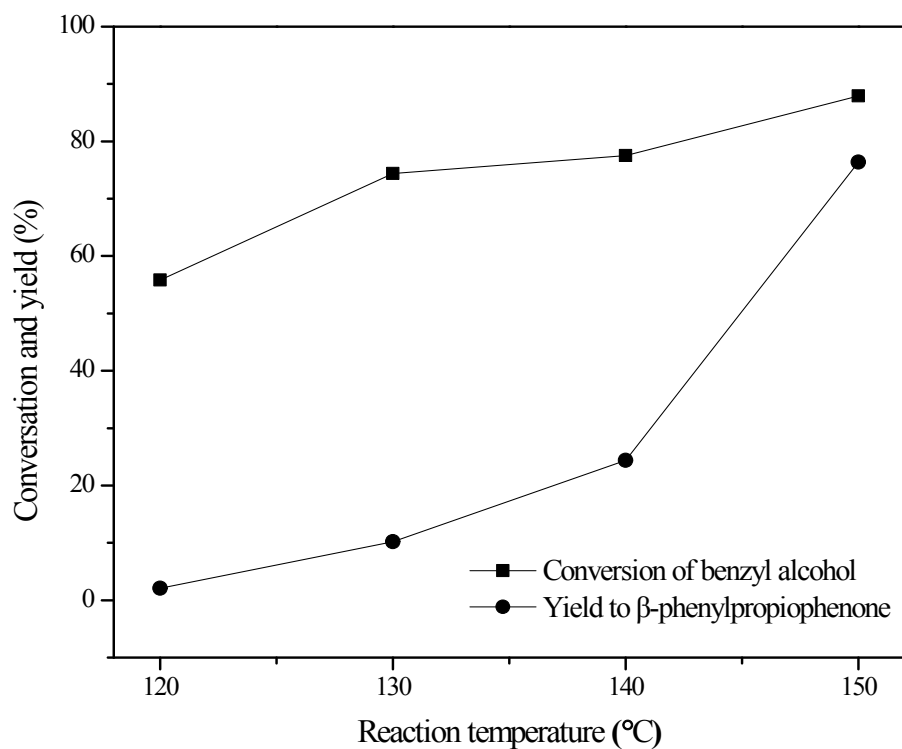

**Fig. 1** Effect of reaction temperature on catalytic activity of Cu-Ag/HT in the dehydrogenation cross-coupling reaction. Reaction conditions: benzyl alcohol (1.0 mmol), 1-phenylethanol (1.0 mmol), Cu-Ag/HT (0.1 g), *o*-xylene (3 mL), 1 bar N<sub>2</sub>, reaction time (0.5 h).

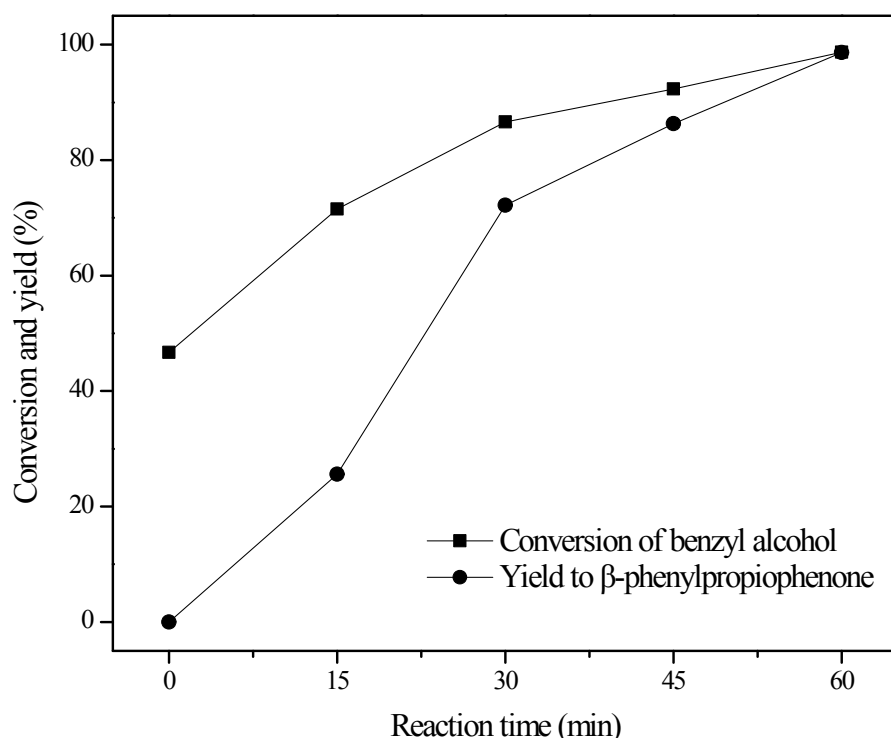

**Fig. 2** Effect of reaction time on yield of  $\beta$ -phenylpropiophenone.

Reaction conditions: benzyl alcohol (1.0 mmol), 1-phenylethanol, (1.0 mmol), Cu-Ag/HT (0.1 g), 150 °C, *o*-xylene (3 mL), 1bar N<sub>2</sub>.

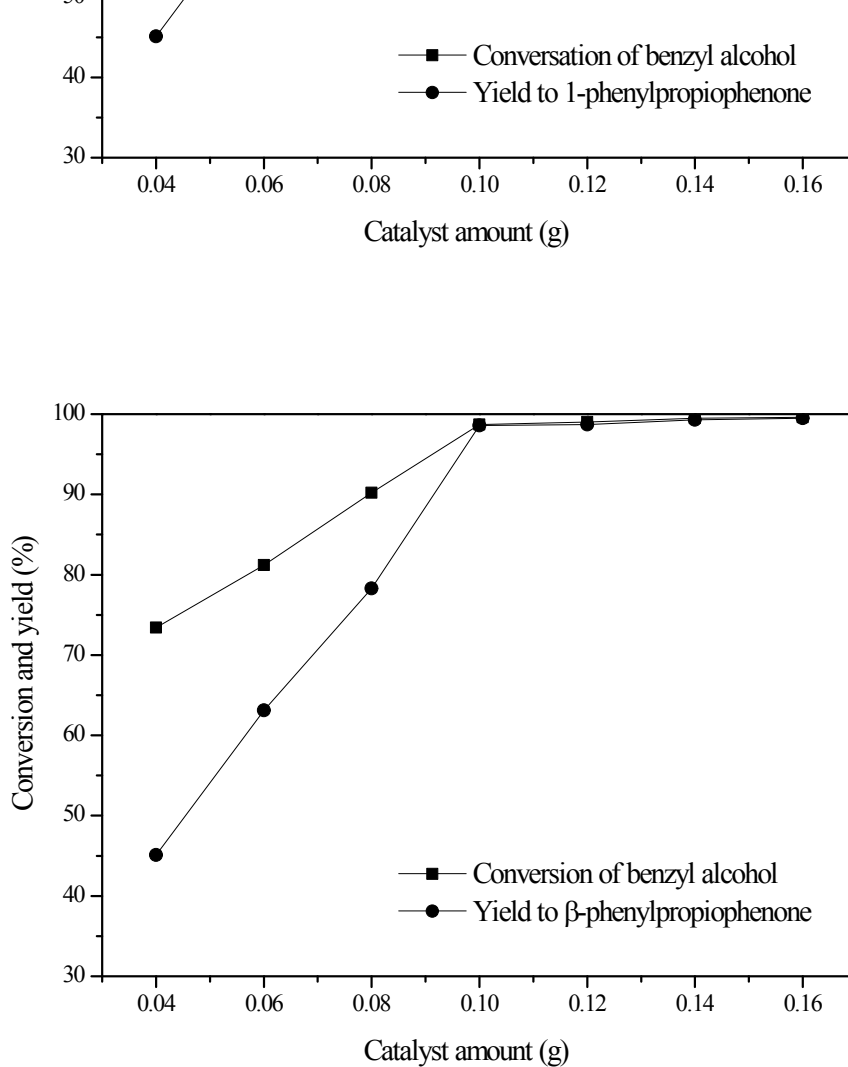

**Fig. 3** Effect of catalyst amount on catalytic activity of Cu-Ag/HT in the dehydrogenation cross-coupling reaction. Reaction conditions: benzyl alcohol (1.0 mmol), 1-phenylethanol (1.0 mmol), *o*-xylene (3 mL), 150 °C, 1 bar N<sub>2</sub>, reaction time of 1 h.
